# Supplementary material for: The chronological evolution of small organic molecular fluorescent probes for thiols
Source: Royal Society of Chemistry journal article supplement (doi:10.1039/d0sc04960c), 2020-12-15
Supplement: d0sc04960c1.pdf [file d0sc04960c1.pdf]

# The chronological evolution of small organic molecular fluorescent probes for thiols

Yongkang Yue,<sup>a</sup> Fangjun Huo<sup>b</sup> and Caixia Yin<sup>\*a</sup>

<sup>a</sup>Key Laboratory of Chemical Biology and Molecular Engineering of Ministry of Education, Institute of Molecular Science, Shanxi University, Taiyuan 030006, China. E-mail: yincx@sxu.edu.cn

<sup>b</sup>Research Institute of Applied Chemistry, Shanxi University, Taiyuan 030006, China.

## I. Reaction mechanisms of the probes with thiols presented in the text.

| NO. | Reaction motif                                                                      | Target     | Ref.  |
|-----|-------------------------------------------------------------------------------------|------------|-------|
| 1   | 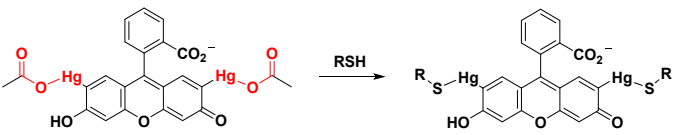   | Thiols     | 25-27 |
| 2   |  | Thiols     | 28-30 |
| 3   |  | GSH or Hcy | 41-43 |
| 4   |  | Thiols     | 34    |

|    |  |                                       |                 |
|----|--|---------------------------------------|-----------------|
| 5  |  | Thiols                                | 45              |
| 6  |  | Thiols                                | 5               |
| 7  |  | Cys and Hcy                           | 6, 46, 47, 58   |
| 8  |  | Thiols                                | 35              |
| 9  |  | Thiols                                | 36              |
| 10 |  | Thiols                                | 59              |
| 11 |  | Cys and Hcy<br>Hcy specific in pH 6.0 | 78-80, 107, 110 |

|    |  |                  |    |
|----|--|------------------|----|
| 12 |  | Thiols           | 37 |
| 13 |  | Thiols           | 60 |
| 14 |  | Thiols           | 53 |
| 15 |  | GSH              | 77 |
| 16 |  | Cys<br>or<br>Hcy | 82 |
| 17 |  | GSH              | 83 |

|    |                                                                                                                                                    |                            |                  |
|----|----------------------------------------------------------------------------------------------------------------------------------------------------|----------------------------|------------------|
| 18 | <p>For Cys      For Hcy      For GSH</p>                                                                                                           | Cys<br>or<br>GSH           | 85               |
| 19 | <p><math>R = \text{OH} \quad \text{CH}_3\text{COO}</math></p>                                                                                      | Thiols                     | 94               |
| 20 |                                                                                                                                                    | Thiols                     | 96               |
| 21 | <p><math>R = \text{N} \quad \text{N} \quad \text{NH}_2</math>      <math>R' = \text{N} \quad \text{N} \quad \text{N} \quad \text{PPh}_3</math></p> | Thiols                     | 95,<br>97,<br>98 |
| 22 | <p>Cys      <math>\text{SO}_3^{2-}</math></p>                                                                                                      | Cys<br>or<br>$\text{SO}_2$ | 101              |

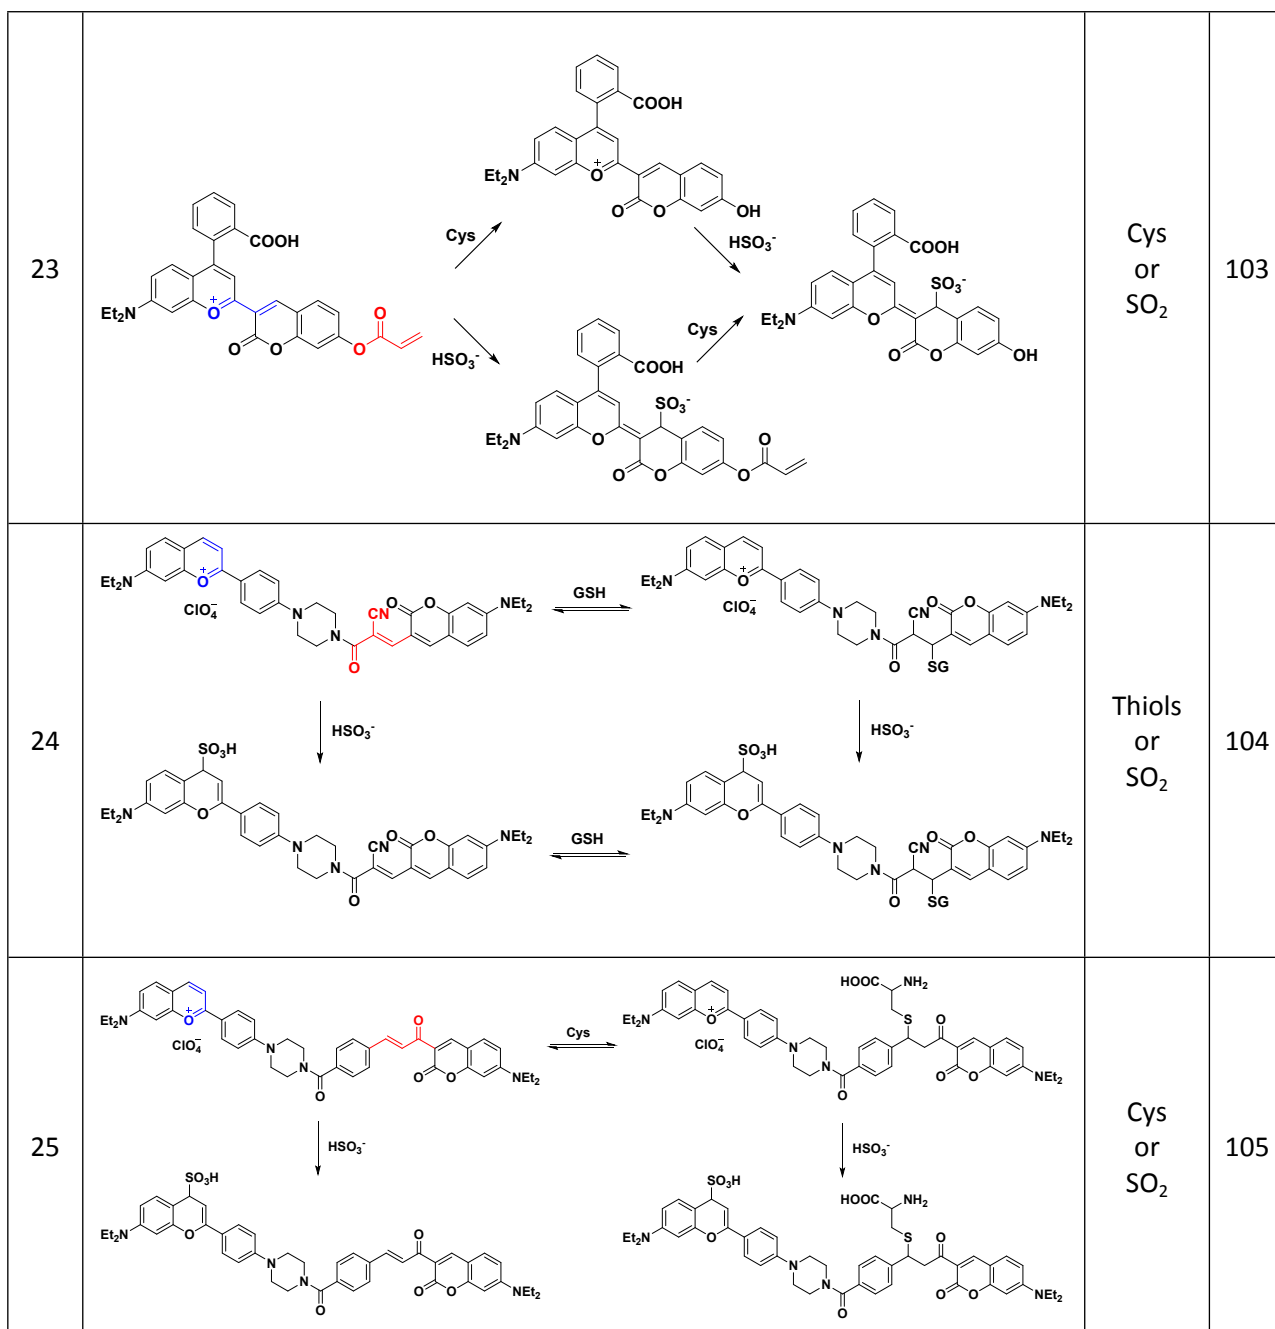

|           |                                                                                                                                                                                                                                                                                                                                                                                                                                                                                                                                       |                                                               |            |
|-----------|---------------------------------------------------------------------------------------------------------------------------------------------------------------------------------------------------------------------------------------------------------------------------------------------------------------------------------------------------------------------------------------------------------------------------------------------------------------------------------------------------------------------------------------|---------------------------------------------------------------|------------|
| <p>26</p> | <p>Reaction scheme for compound 26 showing two pathways:</p> <ul style="list-style-type: none"> <li><b>Top Pathway:</b> Starting material reacts with <math>\text{Cys/Hcy}</math> to form intermediate (a), which is then converted to (c) by <math>\text{SO}_3^{2-}</math>.</li> <li><b>Bottom Pathway:</b> Starting material reacts with <math>\text{GSH}</math> to form intermediate (a), which is then converted to (c) by <math>\text{SO}_3^{2-}</math>. Additionally, the GSH pathway leads to products (d) and (e).</li> </ul> | <p>Cys<br/>or<br/>GSH<br/>or<br/><math>\text{SO}_2</math></p> | <p>106</p> |
| <p>27</p> | <p>Reaction scheme for compound 27 showing the conversion of a starting material to a product with a <math>\text{COOH}</math> group using <math>\text{Hcy}</math>.</p>                                                                                                                                                                                                                                                                                                                                                                | <p>Hcy</p>                                                    | <p>109</p> |

|    |                                                                                                                                                                                                                                                                                             |     |     |
|----|---------------------------------------------------------------------------------------------------------------------------------------------------------------------------------------------------------------------------------------------------------------------------------------------|-----|-----|
| 28 | 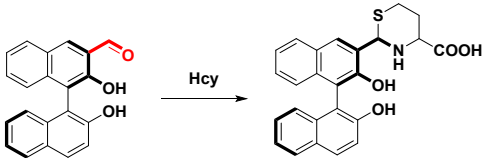 <p>Reaction 28: A complex polycyclic aromatic hydrocarbon (left) with a hydroxyl group and an aldehyde group reacts with Hcy to form a thioether-linked product (right) with a carboxylic acid group.</p> | Hcy | 108 |
| 29 |  <p>Reaction 29: A sulfonamide derivative with a diazonium group (left) reacts with Hcy to form a sulfonamide derivative with an amino group (right).</p>                                                  | Hcy | 68  |
| 30 |  <p>Reaction 30: A complex molecule with a pyridine ring and a ketone group (left) reacts with Hcy to form a thioether-linked product (right) with a carboxylic acid and an amino group.</p>              | Hcy | 111 |

## II. The reported reviews for thiols fluorescent detection.

1. Dai, J.; Ma, C.; Zhang, P.; Fu, Y.; Shen, B. Recent Progress in the Development of Fluorescent Probes for Detection of Biothiols. *Dye. Pigment.* 2020, 177 (March), 108321. <https://doi.org/10.1016/j.dyepig.2020.108321>.
2. Zhang, R.; Yong, J.; Yuan, J.; Ping Xu, Z. Recent Advances in the Development of Responsive Probes for Selective Detection of Cysteine. *Coord. Chem. Rev.* 2020, 408, 213182. <https://doi.org/10.1016/j.ccr.2020.213182>.
3. Yue, Y.; Huo, F.; Cheng, F.; Zhu, X.; Mafireyi, T.; Strongin, R. M.; Yin, C. Functional Synthetic Probes for Selective Targeting and Multi-Analyte Detection and Imaging. *Chem. Soc. Rev.* 2019, 48 (15), 4155–4177. <https://doi.org/10.1039/c8cs01006d>.
4. Kang, Y. F.; Niu, L. Y.; Yang, Q. Z. Fluorescent Probes for Detection of Biothiols Based on “Aromatic Nucleophilic Substitution-Rearrangement” Mechanism. *Chinese Chem. Lett.* 2019, 30 (10), 1791–1798. <https://doi.org/10.1016/j.ccllet.2019.08.013>.
5. Alam, S. F.; Kumar, S.; Ganguly, P. Measurement of Homocysteine: A Historical Perspective. *J. Clin. Biochem. Nutr.* 2019, 65 (3), 171–177. <https://doi.org/10.3164/jcbn.19-49>.
6. Xu, Z.; Qin, T.; Zhou, X.; Wang, L.; Liu, B. Fluorescent Probes with Multiple Channels for Simultaneous Detection of Cys, Hcy, GSH, and H<sub>2</sub>S. *TrAC - Trends Anal. Chem.* 2019, 121, 115672. <https://doi.org/10.1016/j.trac.2019.115672>.
7. Ding, S.; Liu, M.; Hong, Y. Biothiol-Specific Fluorescent Probes with Aggregation-Induced Emission Characteristics. *Sci. China Chem.* 2018, 61 (8), 882–891. <https://doi.org/10.1007/s11426-018-9300-5>.
8. Lee, S.; Li, J.; Zhou, X.; Yin, J.; Yoon, J. Recent Progress on the Development of Glutathione (GSH) Selective Fluorescent and Colorimetric Probes. *Coord. Chem. Rev.* 2018, 366, 29–68. <https://doi.org/10.1016/j.ccr.2018.03.021>.
9. Yin, C. X.; Xiong, K. M.; Huo, F. J.; Salamanca, J. C.; Strongin, R. M. Fluorescent Probes with Multiple Binding Sites for the Discrimination of Cys, Hcy, and GSH. *Angew. Chemie - Int. Ed.* 2017, 56 (43), 13188–13198. <https://doi.org/10.1002/anie.201704084>.
10. Chen, H.; Tang, Y.; Lin, W. Recent Progress in the Fluorescent Probes for the Specific Imaging of Small Molecular Weight Thiols in Living Cells. *TrAC - Trends Anal. Chem.* 2016, 76, 166–181. <https://doi.org/10.1016/j.trac.2015.11.014>.
11. Niu, L. Y.; Chen, Y. Z.; Zheng, H. R.; Wu, L. Z.; Tung, C. H.; Yang, Q. Z. Design Strategies of Fluorescent Probes for Selective Detection among Biothiols. *Chem. Soc. Rev.* 2015, 44 (17), 6143–6160. <https://doi.org/10.1039/c5cs00152h>.
12. Wang, K.; Peng, H.; Wang, B. Recent Advances in Thiol and Sulfide Reactive Probes. *J. Cell. Biochem.* 2014, 115 (6), 1007–1022. <https://doi.org/10.1002/jcb.24762>.
13. Wang, S.; Shen, S.; Zhang, Y.; Dai, X.; Zhao, B. Recent Progress in Fluorescent Probes for the Detection of Biothiols. *Chinese J. Org. Chem.* 2014, 34 (9), 1717–1729. <https://doi.org/10.6023/cjoc201403030>.



14. Jung, H. S.; Chen, X.; Kim, J. S.; Yoon, J. Recent Progress in Luminescent and Colorimetric Chemosensors for Detection of Thiols. *Chem. Soc. Rev.* 2013, 42 (14), 6019–6031. <https://doi.org/10.1039/c3cs60024f>.
15. Yin, C.; Huo, F.; Zhang, J.; Martínez-Máñez, R.; Yang, Y.; Lv, H.; Li, S. Thiol-Addition Reactions and Their Applications in Thiol Recognition. *Chem. Soc. Rev.* 2013, 42 (14), 6032–6059. <https://doi.org/10.1039/c3cs60055f>.
16. Peng, H.; Chen, W.; Cheng, Y.; Hakuna, L.; Strongin, R.; Wang, B. Thiol Reactive Probes and Chemosensors. *Sensors (Switzerland)* 2012, 12 (11), 15907–15946. <https://doi.org/10.3390/s121115907>.
